# Supplementary material for: A Stochastic Individual-Based Model of the Progression of Atrial Fibrillation in Individuals and Populations
Source: PubMed Central journal article supplement (PMC4829251; doi:10.1371/journal.pone.0152349), 2016-04-12

(a)

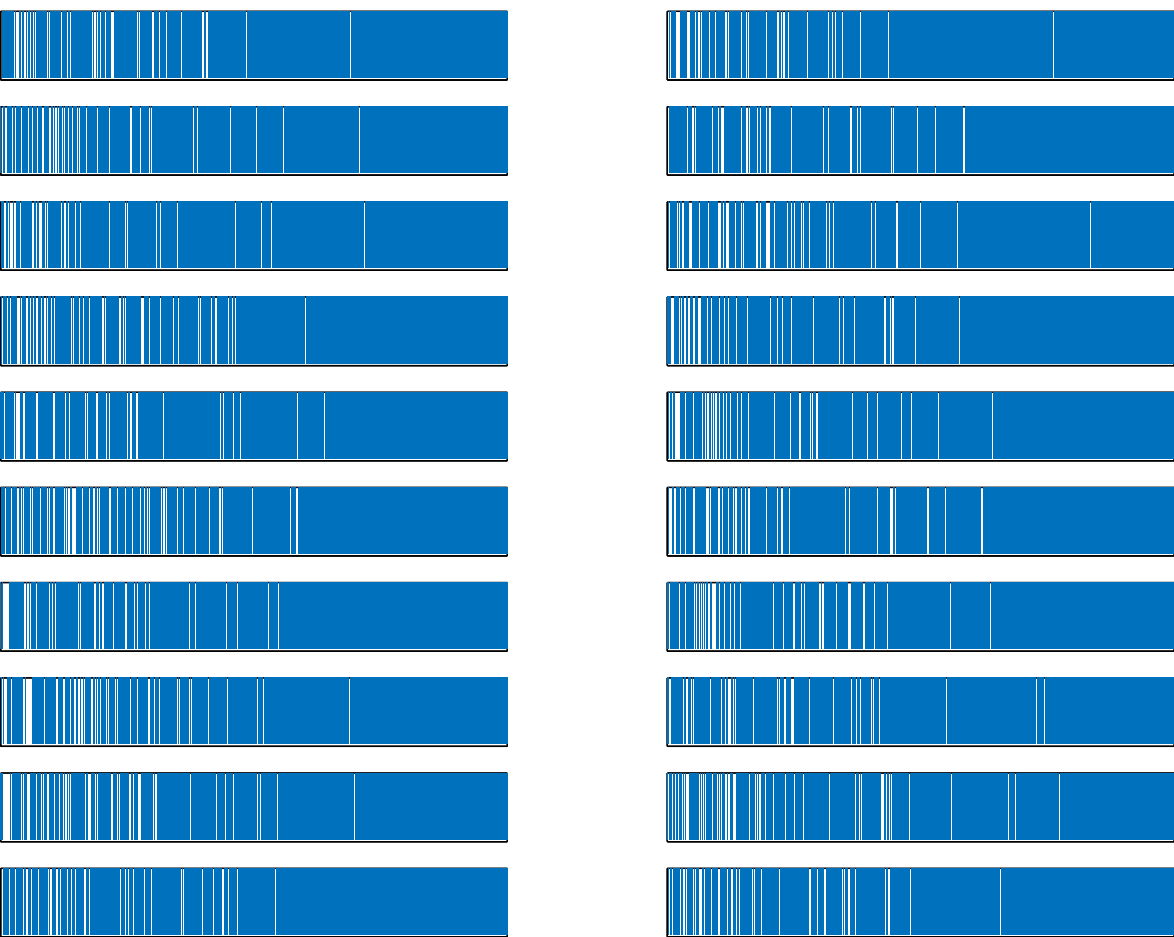

(b)

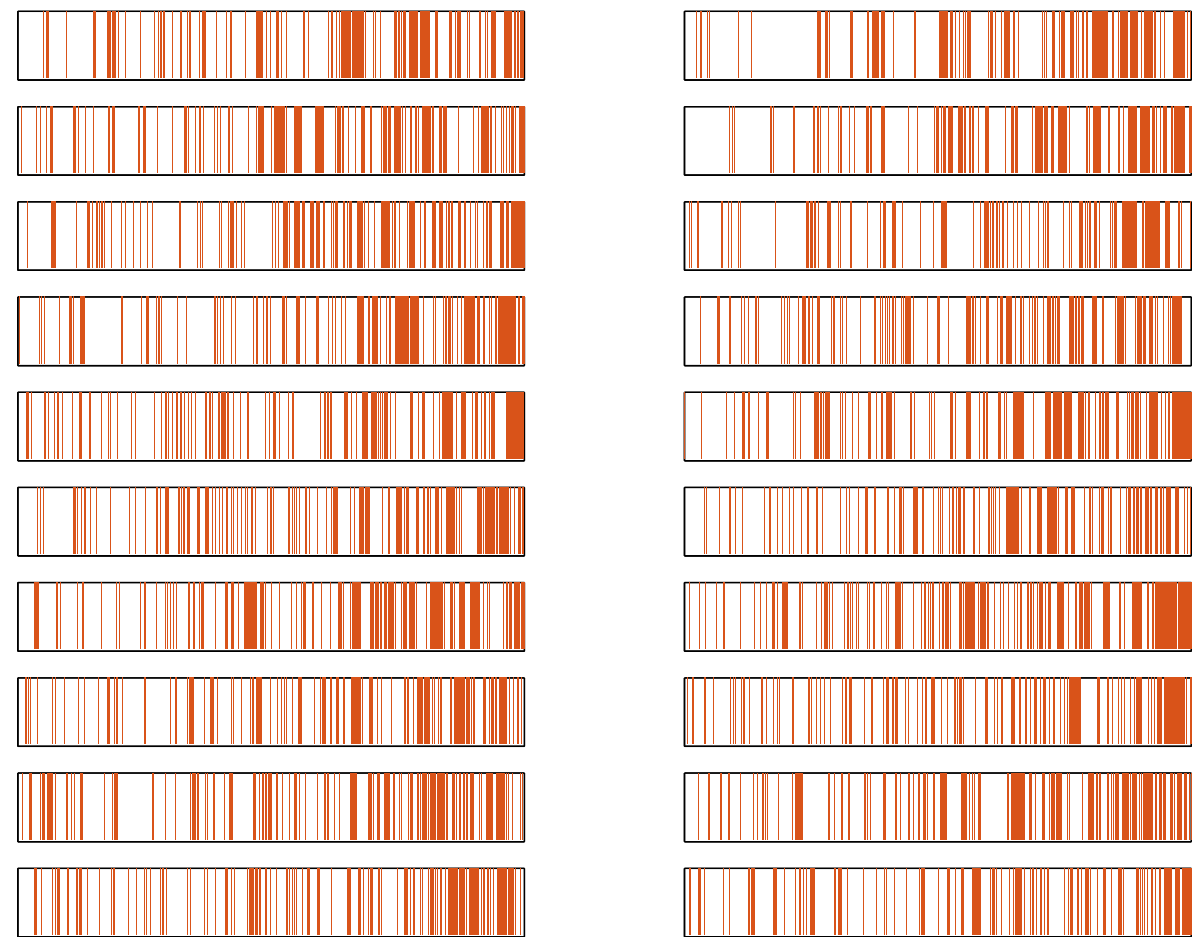

(c)

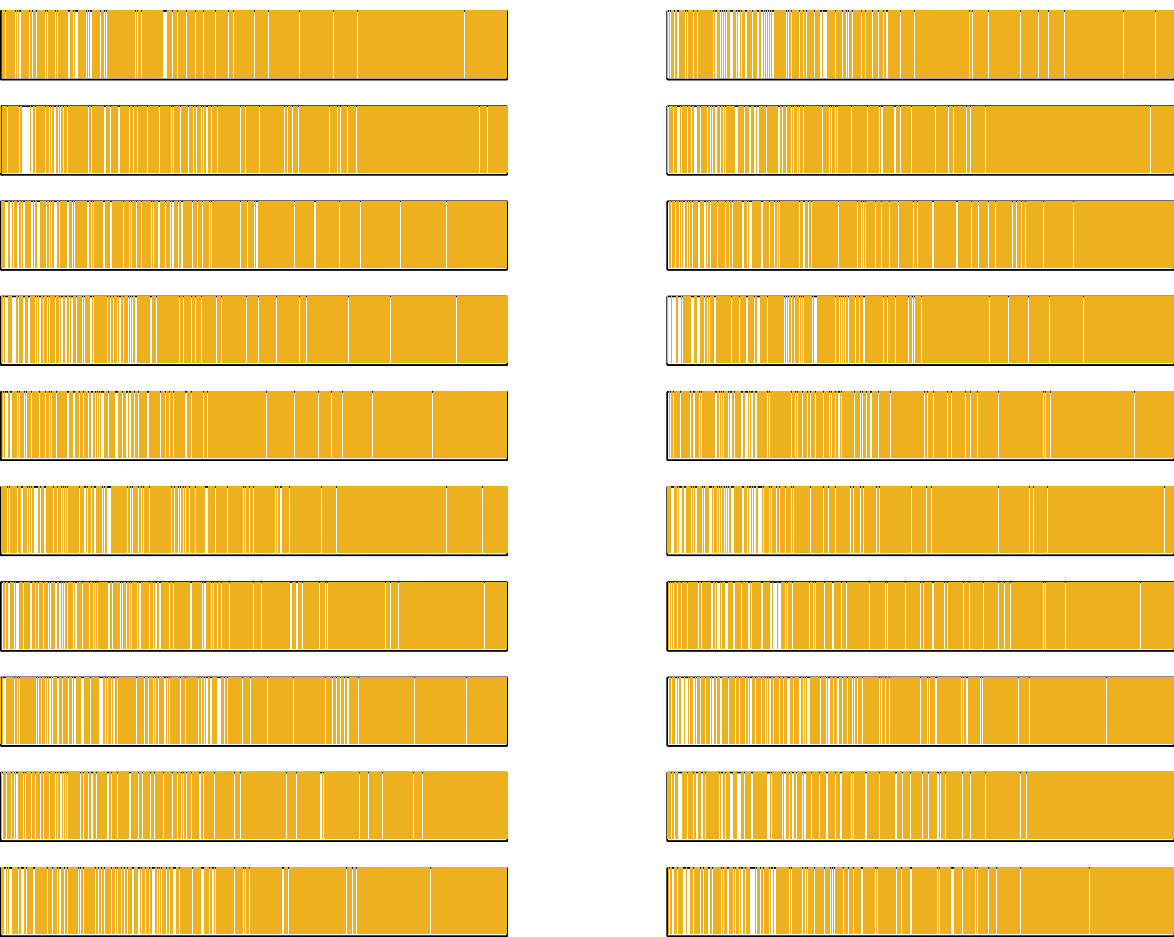

(d)

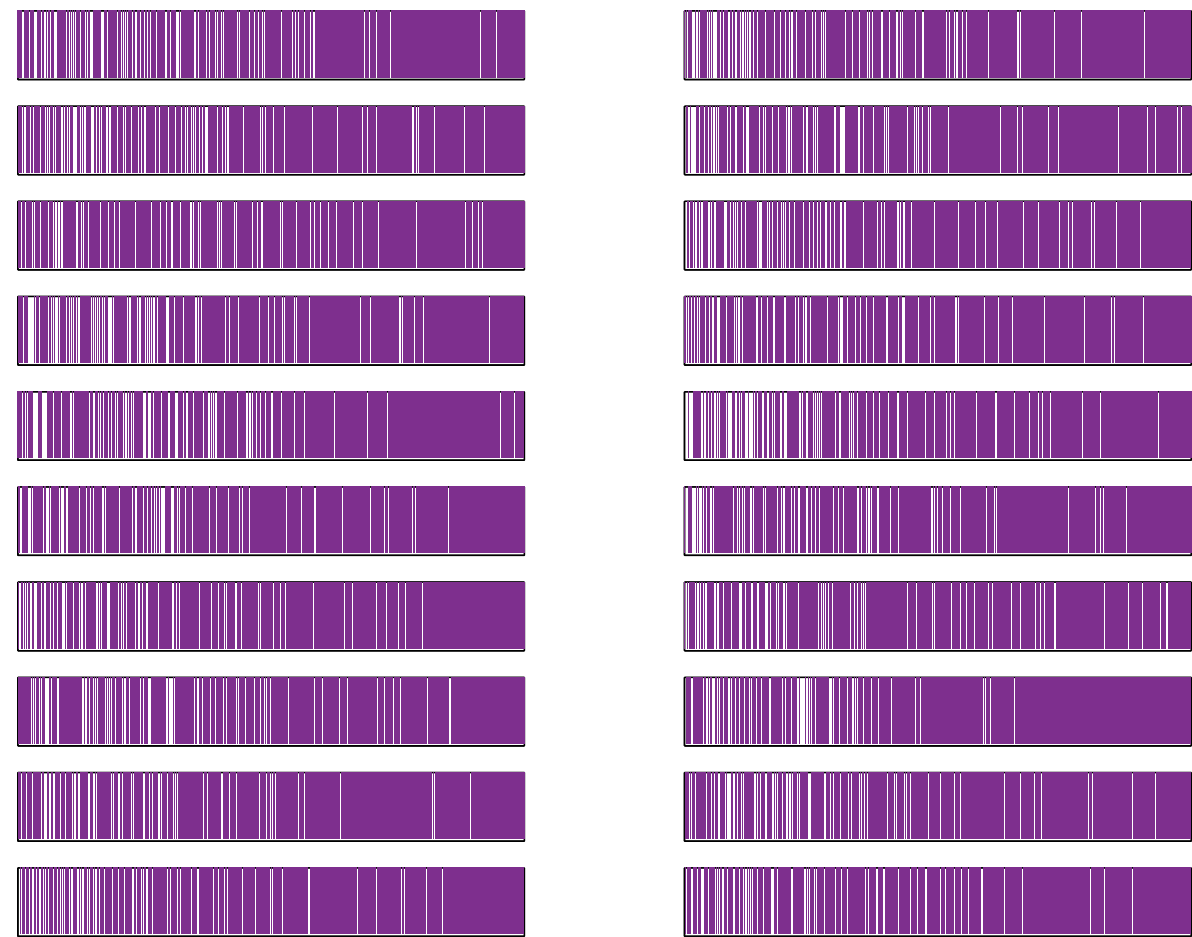

Supplement: pone.0152349.s003.pdf [file pone.0152349.s003.pdf]
